# Supplementary material for: The E3 ubiquitin ligase RNF121 is a positive regulator of NF-κB activation
Source: PubMed Central journal article supplement (PMC4232610; doi:10.1186/s12964-014-0072-8), 2014-11-12
Supplement: 12964_2014_72_MOESM6_ESM.pdf [file 12964_2014_72_MOESM6_ESM.pdf]

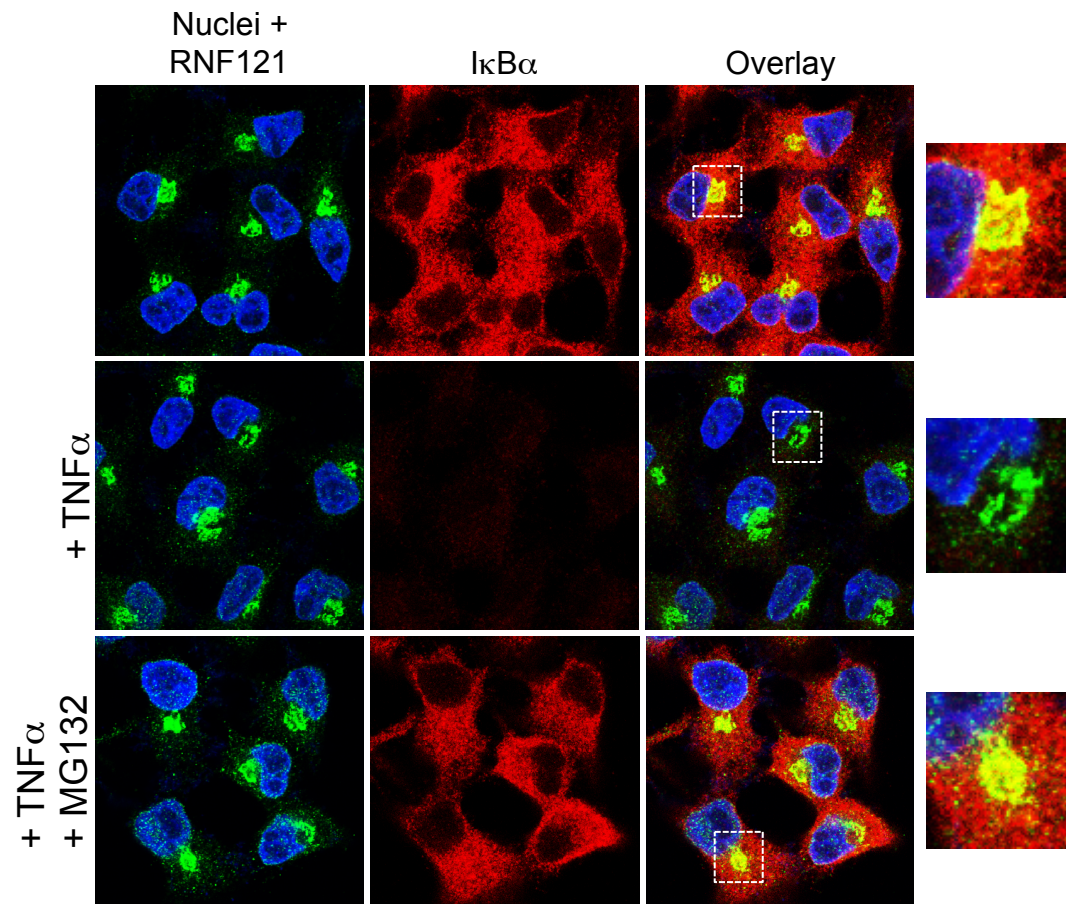

## Additional File 6

### Additional file 6. A pool of I $\kappa$ B $\alpha$ co-localizes with RNF121

(A) HeLa cells were treated or not with TNF $\alpha$  (10 ng/ml) for 15 min in the absence or the presence of the proteasome inhibitor MG132 (10  $\mu$ M), then the localization of RNF121 and I $\kappa$ B $\alpha$  were investigated by immuno-fluorescence. Nuclei were stained with DAPI. Representative images are shown, with the boxed areas enlarged on the right.
