# Supplementary material for: The E3 ubiquitin ligase RNF121 is a positive regulator of NF-κB activation
Source: PubMed Central journal article supplement (PMC4232610; doi:10.1186/s12964-014-0072-8), 2014-11-12
Supplement: 12964_2014_72_MOESM8_ESM.pdf [file 12964_2014_72_MOESM8_ESM.pdf]

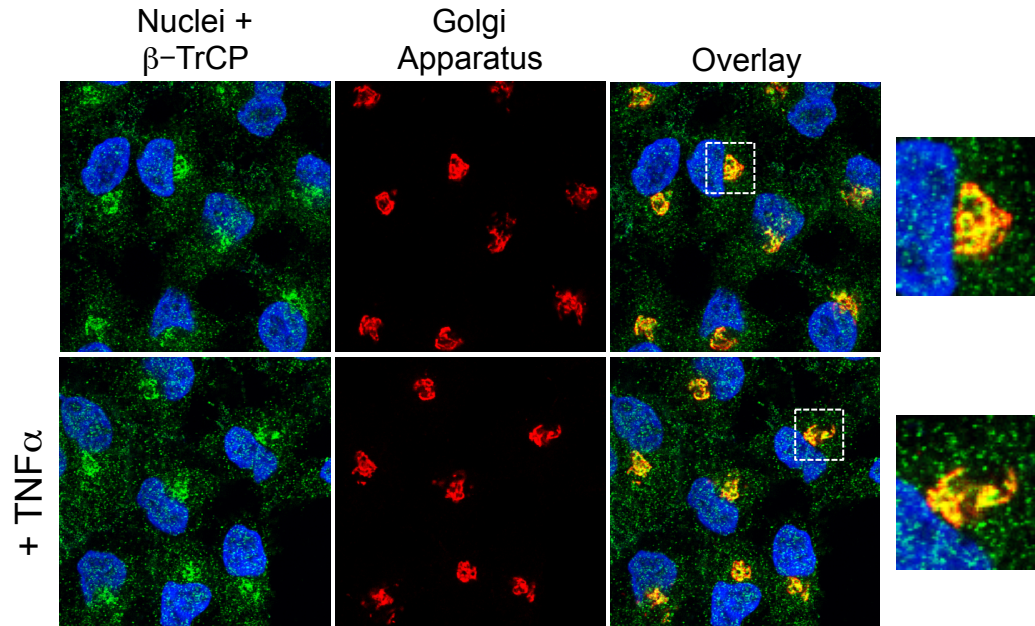

## Additional File 8

### Additional file 8. Intracellular localization of $\beta$ -TrCP.

HeLa cells were treated or not with TNF $\alpha$  (10 ng/ml) for 15 min, then  $\beta$ -TrCP localization was investigated by immuno-fluorescence. GM130 was used as a marker for the Golgi Apparatus. Nuclei were stained with DAPI. Representative images are shown, with the boxed areas enlarged on the right.
